# Supplementary material for: An NPPB Promoter Polymorphism Associated With Elevated N‐Terminal pro–B‐Type Natriuretic Peptide and Lower Blood Pressure, Hypertension, and Mortality
Source: PubMed Central journal article supplement (PMC5533018; doi:10.1161/jaha.116.005257), 2017-03-24
Supplement: JAH3-6-e005257-s001.pdf [file JAH3-6-e005257-s001.pdf]

# **SUPPLEMENTAL MATERIAL**

**Table S1.** Systolic and Diastolic Blood Pressure\*, use of anti-hypertension (anti-HTN) meds and prevalence of HTN (defined as +anti-HTN meds or BP>140/80) from Visit 1 (average age 54), Visit 2 (average age 57), Visit 3 (average age 60), Visit 4 (average age 63) and Visit 5 (average age 76) in blacks and whites.

| Characteristic                | AA           | AG               | GG               | P-trend |
|-------------------------------|--------------|------------------|------------------|---------|
| V1 SBP                        | 125.9 ± 0.33 | 125.6 ± 0.28     | 124.9 ± 0.45     | 0.038   |
| V1 DBP                        | 76.1 ± 0.19  | 75.9 ± 0.16      | 75.6 ± 0.25      | 0.074   |
| V1 anti-HTN meds, N (%)       | 1256 (32.6%) | 1697 (31.3%)     | 589 (29.1%)      |         |
| V1 anti-HTN meds, OR (95% CI) | Reference    | 0.98 (0.89-1.08) | 0.92 (0.81-1.04) | 0.19    |
| V1 HTN, N (%)                 | 1103 (28.5%) | 1536 (28.2%)     | 542 (26.6%)      |         |
| V1 HTN, OR (95% CI)           | Reference    | 0.93 (0.85-1.03) | 0.86 (0.76-0.97) | 0.012   |
| V2 SBP                        | 126.3 ± 0.34 | 125.8 ± 0.29     | 124.7 ± 0.46     | 0.006   |
| V2 DBP                        | 75.3 ± 0.19  | 74.9 ± 0.16      | 74.3 ± 0.26      | 0.003   |
| V2 anti-HTN meds, N (%)       | 954 (24.6%)  | 1303 (23.9%)     | 441 (21.7%)      |         |
| V2 anti-HTN meds, OR (95% CI) | Reference    | 0.96 (0.87-1.06) | 0.85 (0.74-0.97) | 0.021   |
| V2 HTN, N (%)                 | 1299 (35.0%) | 1766 (33.8%)     | 595 (30.3%)      |         |
| V2 HTN, OR (95% CI)           | Reference    | 0.95 (0.86-1.04) | 0.81 (0.72-0.92) | 0.002   |
| V3 SBP                        | 129.7± 0.36  | 128.9± 0.30      | 128.1 ± 0.49     | 0.002   |
| V3 DBP                        | 74.5 ± 0.20  | 74.5 ± 0.17      | 73.7 ± 0.27      | 0.036   |
| V3 anti-HTN meds, N (%)       | 1003 (25.9%) | 1354 (24.8%)     | 478 (23.5%)      |         |
| V3 anti-HTN meds, OR (95% CI) | Reference    | 0.93 (0.85-1.03) | 0.85 (0.75-0.98) | 0.019   |
| V3 HTN, N (%)                 | 1321 (39.9%) | 1790 (38.2%)     | 644 (36.1%)      |         |
| V3 HTN, OR (95% CI)           | Reference    | 0.92 (0.84-1.01) | 0.86 (0.76-0.97) | 0.010   |
| V4 SBP                        | 133.9 ± 0.38 | 132.7 ± 0.33     | 132.5 ± 0.52     | 0.008   |
| V4 DBP                        | 75.2 ± 0.21  | 74.6 ± 0.18      | 74.2 ± 0.28      | 0.005   |
| V4 anti-HTN meds, N (%)       | 1083 (28.0%) | 1463 (26.8%)     | 518 (25.5%)      |         |
| V4 anti-HTN meds, OR (95% CI) | Reference    | 0.95 (0.86-1.05) | 0.85 (0.75-0.97) | 0.020   |
| V4 HTN, N (%)                 | 1444 (47.4%) | 1914 (45.2%)     | 704 (43.4%)      |         |
| V4 HTN, OR (95% CI)           | Reference    | 0.90 (0.82-0.99) | 0.85 (0.75-0.96) | 0.005   |
| V5 SBP                        | 135.8 ± 0.47 | 133.1± 0.40      | 134.2 ± 0.62     | 0.3     |
| V5 DBP                        | 69.3 ± 0.27  | 68.7 ± 0.23      | 68.5 ± 0.36      | 0.059   |
| V5 anti-HTN meds, N (%)       | 1125 (67.6%) | 1519 (65.1%)     | 626 (67.1%)      |         |

|                               |              |                  |                  |      |
|-------------------------------|--------------|------------------|------------------|------|
| V5 anti-HTN meds, OR (95% CI) | Reference    | 0.89 (0.78-1.02) | 0.99 (0.83-1.18) | 0.68 |
| V5 HTN, N (%)                 | 1264 (75.6%) | 1694 (72.5%)     | 692 (73.9%)      |      |
| V5 HTN, OR (95% CI)           | Reference    | 0.85 (0.73-0.99) | 0.92 (0.77-1.11) | 0.2  |

\*Adjusted for age, sex, and race; SBP adjusted for +15mmHg and DBP +10mmHg if patient taking anti-HTN medication. P-values include adjustment for Principle Components.

**Table S2.** Risk of All cause mortality, Cardiovascular (CV) and non-CV Death based on ICD codes in Subjects in the Atherosclerosis Risk in Communities Study cohort stratified by rs198389 polymorphism in the B-type Natriuretic Peptide gene Post V1 (Model 2 is post V2).

| Rs198389                                  | AA          | AG               | GG               | P-value for trend | P-value for recessive model |
|-------------------------------------------|-------------|------------------|------------------|-------------------|-----------------------------|
| Total Cohort, N=11,361                    | 3874        | 5453             | 2034             |                   |                             |
| Death, N (%)                              | 1395 (36%)  | 1958(36%)        | 678 (33%)        |                   |                             |
| Death, HR (95% CI), Crude                 | Reference   | 1.00 (0.93-1.07) | 0.91 (0.83-1.00) | 0.069             | 0.026                       |
| Death, HR (95% CI), Age, sex, race        | Reference   | 0.97 (0.90-1.03) | 0.90 (0.82-0.99) | 0.030             | 0.049                       |
| Death, HR (95% CI), Model 1               | Reference   | 0.97 (0.90-1.04) | 0.90 (0.82-1.00) | 0.014             | 0.015                       |
| Death, HR (95% CI), Model 2               | Reference   | 0.95 (0.88-1.03) | 0.86 (0.78-0.95) | 0.005             | 0.011                       |
| CV Death, N (%)                           | 377 (9.7%)  | 533 (9.8%)       | 167 (8.2%)       |                   |                             |
| CV Death, HR (95% CI), Crude              | Reference   | 1.02 (0.88-1.15) | 0.84 (0.70-1.00) | 0.102             | 0.031                       |
| CV Death, HR (95% CI), Age, sex, race     | Reference   | 0.96 (0.84-1.10) | 0.83 (0.69-0.99) | 0.059             | 0.051                       |
| CV Death, HR (95% CI), Model 1            | Reference   | 0.97 (0.84-1.11) | 0.77 (0.63-0.94) | 0.019             | 0.009                       |
| CV Death, HR (95% CI), Model 2            | Reference   | 0.98 (0.84-1.14) | 0.75 (0.61-0.92) | 0.017             | 0.005                       |
| Non-CV Death, N (%)                       | 797 (20.6%) | 1036 (20.4%)     | 362 (18.8%)      |                   |                             |
| Non-CV Death, HR (95% CI), Crude          | Reference   | 0.99 (0.90-1.08) | 0.90 (0.79-1.01) | 0.11              | 0.066                       |
| Non-CV Death, HR (95% CI), Age, sex, race | Reference   | 0.97 (0.88-1.06) | 0.90 (0.79-1.01) | 0.088             | 0.11                        |
| Non-CV Death, HR (95% CI), Model 1        | Reference   | 0.97 (0.88-1.06) | 0.89 (0.78-1.01) | 0.082             | 0.095                       |
| Non-CV Death, HR (95% CI), Model 2        | Reference   | 0.95 (0.85-1.06) | 0.84 (0.72-0.97) | 0.022             | 0.032                       |

Model 1= DM, BMI, Tchol, HDL, tobacco use and prior HF; Stratified by age, sex, and race; All models include adjustment for Principle Components

Model 2= Model 1 + genotype-adjusted logNT-proBNP

**Figure S1.** Risk of Cardiovascular Death in Subjects in the Atherosclerosis Risk in Communities Study cohort with the GG genotype of the rs198389 polymorphism in the B-type Natriuretic Peptide gene versus GA or AA genotypes by study Center.

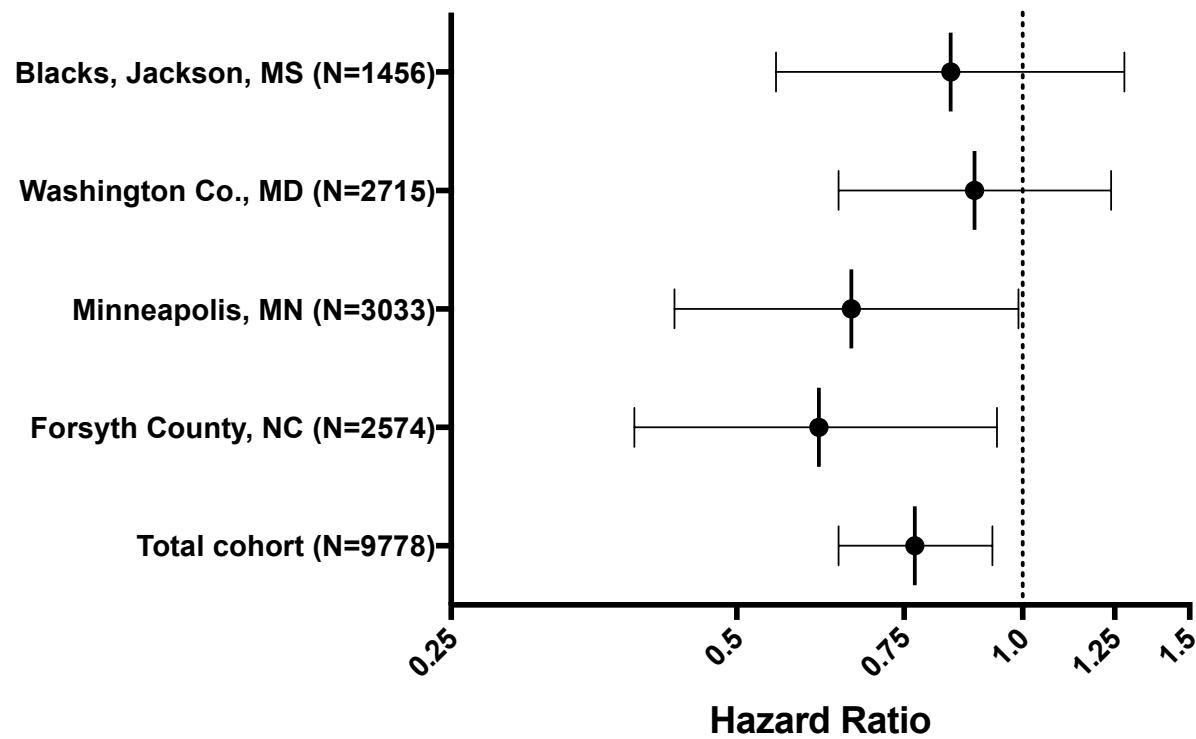

Adjusted for DM, BMI, Tchol, HDL, tobacco use and prior HF, genotype-adjusted log N-terminal B-type natriuretic peptide, and principle components; Stratified by age, sex, and race.
